# Supplementary material
Source: PubMed Central journal article supplement (PMC3811342)
Supplement: AEM.00971-13_zam999104728so1.pdf [file AEM.00971-13_zam999104728so1.pdf]

**TABLE S1** Strains, plasmids, and oligonucleotide primers used in this study

| <b>Strains</b>             | <b>Description</b>                                                                                      | <b>Sources</b>                             |
|----------------------------|---------------------------------------------------------------------------------------------------------|--------------------------------------------|
| <i>C. beijerinckii</i>     |                                                                                                         |                                            |
| NCIMB 8052                 | Wild type                                                                                               | Lab stock                                  |
| <i>pta</i> ::int(17)       | Group II intron inserted at 17/18a bp of <i>pta</i> <sup>a</sup>                                        | This study                                 |
| <i>buk</i> ::int(532)      | Group II intron inserted at 532/533s bp of <i>buk</i> <sup>b</sup>                                      | This study                                 |
| <i>E. coli</i>             |                                                                                                         |                                            |
| Turbo                      | High efficiency chemically competent cell                                                               | NEB <sup>c</sup>                           |
| Top10                      | Electrocomp <sup>TM</sup> competent cell                                                                | Invitrogen <sup>d</sup>                    |
| <b>Plasmids</b>            | <b>Description &amp; Relevant characteristics</b>                                                       | <b>References</b>                          |
| pTJ1                       | Ap <sup>r</sup> , Em <sup>r</sup> , <i>C. beijerinckii</i> - <i>E. coli</i> shuttle vector <sup>e</sup> | (1)                                        |
| pJIR750ai                  | L1.LtrB-ΔORF intron and ltrA, targeting <i>C.perfringens</i> alpha toxin gene                           | (2)                                        |
| pCR-XL-TOPO <sup>®</sup>   | one-step cloning vector for long PCR products                                                           | Invitrogen <sup>d</sup>                    |
| pYW1                       | pTJ1 integrated with intron+ltrA, and <i>ptb</i> promoter                                               | This study                                 |
| pYW1- <i>pta</i>           | pYW1 with intron targeting <i>pta</i>                                                                   | This study                                 |
| pYW1- <i>buk</i>           | pYW1 with intron targeting <i>buk</i>                                                                   | This study                                 |
| <b>Primers</b>             | <b>Sequence (5'-3')</b>                                                                                 | <b>Description</b>                         |
| Intron-F                   | CCCGGGATAATTATCCTTACCAGCCCATAGG                                                                         | XmaI                                       |
| Intron-R                   | CTTGTAGATATGACGACAGGAAGAGT                                                                              |                                            |
| <i>ptb</i> -p-F            | GTATATCAAGCTTGAAGATATATTATATTACGTTC<br>GTGTTGTGA                                                        | HindIII                                    |
| <i>ptb</i> -p-R            | GTATATCACTAGTAATCAATGCTATGAATATTTCT<br>TTATACCTT                                                        | SpeI                                       |
| <i>pta</i> -17/18a-IBS     | AAAACCCGGGATAATTATCCTTAGCAGTCCATA<br>TTGTGCGCCAGATAGGGTG                                                | XmaI                                       |
| <i>pta</i> -17/18a-EBS1d   | CAGATTGTACAAATGTGGTGATAACAGATAAGT<br>CCATATTTTTAACTTACCTTTCTTTGT                                        | BsrGI                                      |
| <i>pta</i> -17/18a-EBS2    | TGAACGCAAGTTTCTAATTTTCGATTACTGCTCG<br>ATAGAGGAAAGTGTCT                                                  |                                            |
| EBS universal              | CGAAATTAGAACTTGCGTTCAGTAAAC                                                                             | Universal primer for knockout re-targeting |
| <i>pta</i> -17/18a-F       | TTGTTATTTTACAGGAGTATTGTCTGA                                                                             | Confirmation of knockout for <i>pta</i>    |
| <i>pta</i> -17/18a-R       | TCTTTCCTCGTTTCCCTCTG                                                                                    | Confirmation of knockout for <i>pta</i>    |
| <i>buk</i> -532/533s-IBS   | AAAACCCGGGATAATTATCCTTAATGAACACCT<br>AAGTGCGCCAGATAGGGTG                                                | XmaI                                       |
| <i>buk</i> -532/533s-EBS1d | CAGATTGTACAAATGTGGTGATAACAGATAAGT<br>CACCTAAATTAACCTTTCTTTGT                                            | BsrGI                                      |
| <i>buk</i> -532/533s-EBS2  | TGAACGCAAGTTTCTAATTTTCGGTTTTTCATCCG<br>ATAGAGGAAAGTGTCT                                                 |                                            |
| <i>buk</i> -532/533s-F     | GCTTCTAACCTTGGCGGAAT                                                                                    | Confirmation of knockout for <i>buk</i>    |
| <i>buk</i> -532/533s-R     | AACGCCTCCACCCATATGTA                                                                                    | Confirmation of                            |

|                       |                         |                                                        |
|-----------------------|-------------------------|--------------------------------------------------------|
| pYW1-cure-F           | GCTTTCGTTTCGTTCCCATATA  | knockout for <i>buk</i><br>Detection of plasmid curing |
| pYW1-cure-R           | TGAATTGATTGGGCCCTCTA    | Detection of plasmid curing                            |
| Intron-SB-F           | CCTATGGGAACGAAACGAAA    | Amplification of Southern blotting probe               |
| Intron-SB-R           | CGAGTACTCCGTACCCTTGC    | Amplification of Southern blotting probe               |
| <i>buk</i> -qPCR-U-F  | TGTTGGTAGAGGTGGAATGCT   | q-RT-PCR, upstream of intron insertion                 |
| <i>buk</i> -qPCR-U-R  | GCATGAGGTCCTTGAACCTCC   | q-RT-PCR, upstream of intron insertion                 |
| <i>buk</i> -qPCR-D-F  | GGAAAAGGTGGATTTGTTGGT   | q-RT-PCR, downstream of intron insertion               |
| <i>buk</i> -qPCR-D-R  | ACTGGGGCTATCCATTCAACT   | q-RT-PCR, downstream of intron insertion               |
| <i>bukII</i> -qPCR-F  | TAGTTGGAAGAGGTGGCCTTT   | q-RT-PCR, for <i>bukII</i>                             |
| <i>bukII</i> -qPCR-R  | CTGGCACTCCTGAAAGTCTTG   | q-RT-PCR, for <i>bukII</i>                             |
| <i>bukIII</i> -qPCR-F | CACAAACGATGCTAGGGTTGTA  | q-RT-PCR, for <i>bukIII</i>                            |
| <i>bukIII</i> -qPCR-R | AGCATTTTCATCTTCACCTGGAT | q-RT-PCR, for <i>bukIII</i>                            |
| <i>16s</i> -qPCR-F    | CCGCTAACGCATTAAGTATTCC  | q-RT-PCR, for 16s RNA as endogenous control            |
| <i>16s</i> -qPCR-R    | CTTAACCCAACATCTCACGACA  | q-RT-PCR, for 16s RNA as endogenous control            |

<sup>a</sup> 17/18a, between 17 and 18 bp in the antisense direction

<sup>b</sup> 532/533s, between 532 and 533 bp in the sense direction

<sup>c</sup> New England Biolabs Inc., Ipswich, MA

<sup>d</sup> Invitrogen Inc., Grand Island, NY

<sup>e</sup> Ap, ampicillin; Em, erythromycin

## REFERENCES

1. Jesse TW. 2003. Genetic characterization and manipulation of solvent-producing clostridia. PhD dissertation. University of Illinois at Urbana-Champaign, Urbana, IL.
2. Chen Y, McClane BA, Fisher DJ, Rood JI, Gupta P. 2005. Construction of an alpha toxin gene knockout mutant of *Clostridium perfringens* type A by use of a mobile group II intron. *Appl. Environ. Microbiol.* 71:7542-7547.

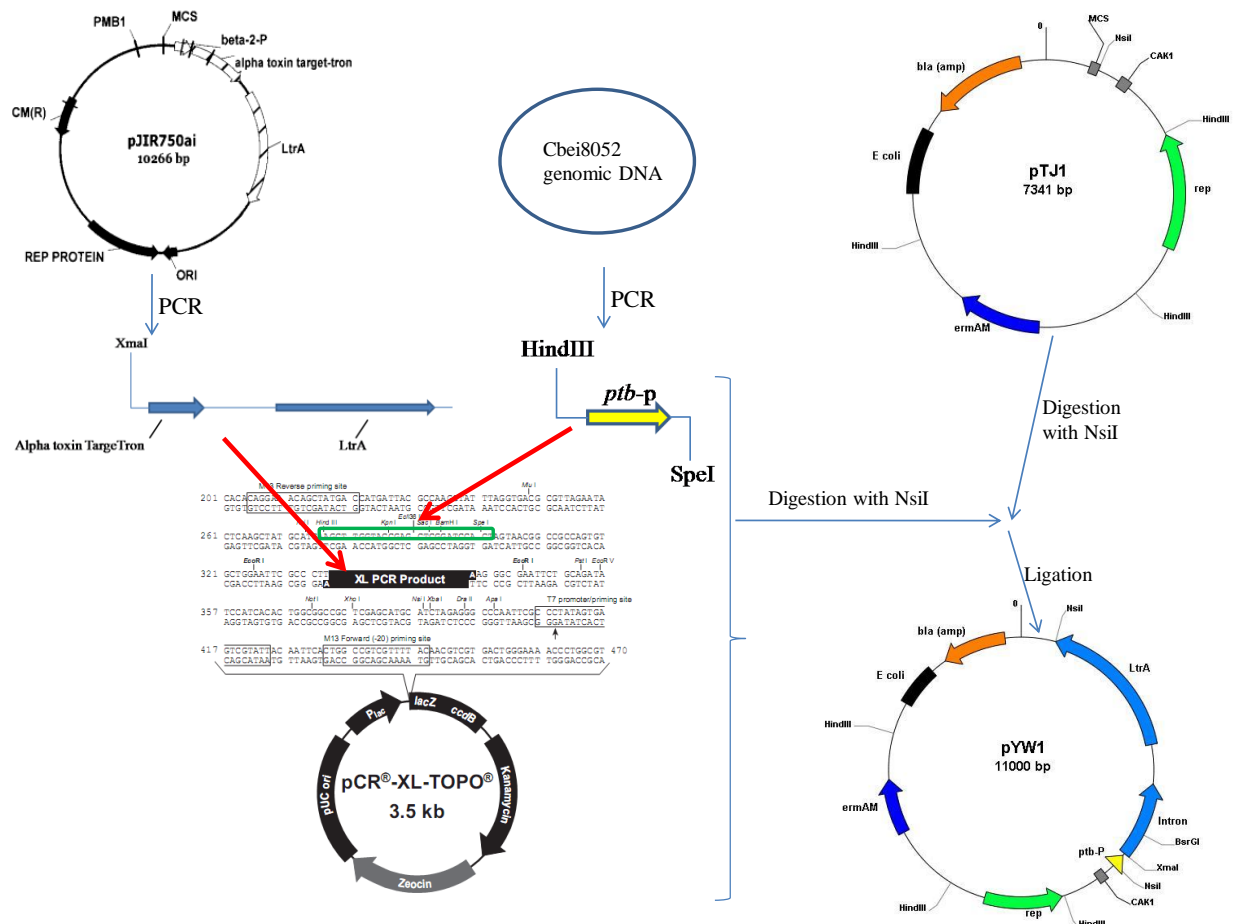

**FIG S1** The schematic diagram for construction of the Targetron plasmid pYW1 for gene knockout in *C. beijerinckii*. The DNA fragment containing the LtrB intron and LtrA gene in pJIR750ai (1) was first amplified by PCR, with an *Xma*I restriction enzyme site introduced for later intron re-targeting purposes. The PCR product was cloned into the cloning site of pCR-XL-TOPO<sup>®</sup> vector (Invitrogen, Grand Island, NY). The *ptb* promoter from *C. beijerinckii* 8052 genomic DNA was amplified by PCR with introduction of the *Hind*III and *Spe*I sites into the fragment. The PCR product was integrated into the *Hind*III and *Spe*I sites of the pCR-XL-TOPO<sup>®</sup> vector containing the intron fragment. The resulting cloning vector was digested with *Nsi*I, and ligated into pTJ1 digested with the same enzyme. The plasmid with the insertion at the desired direction was verified by sequencing and named pYW1 for later intron re-targeting and gene disruption.

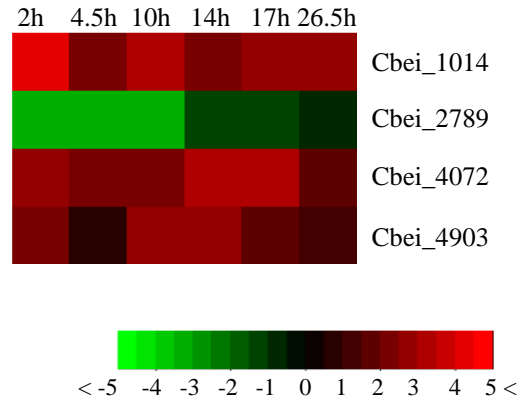

**FIG S2 The dynamic transcriptional profiles of lactate dehydrogenase genes over the batch fermentation process based on the RNA-Seq data published earlier (2).**

## REFERENCES

1. Chen Y, McClane BA, Fisher DJ, Rood JI, Gupta P. 2005. Construction of an alpha toxin gene knockout mutant of *Clostridium perfringens* type A by use of a mobile group II intron. *Appl. Environ. Microbiol.* 71:7542-7547.
2. Wang Y, Li X, Mao Y, Blaschek H. 2012. Genome-wide dynamic transcriptional profiling in *Clostridium beijerinckii* NCIMB 8052 using single-nucleotide resolution RNA-Seq. *BMC Genomics* 13:102.
